# Supplementary material
Source: PubMed Central journal article supplement (PMC3787845)
Supplement: NIHMS506553-supplement-01.pdf [file NIHMS506553-supplement-01.pdf]

**SUPPLEMENTAL INFORMATION****Branched signal wiring of an essential bacterial cell-cycle phosphotransfer protein****Jimmy A. Blair<sup>#1,5</sup>, Qingping Xu<sup>#2,3</sup>, W. Seth Childers<sup>#1</sup>, Irimpan I. Mathews<sup>2</sup>, Justin W. Kern<sup>1</sup>, Michael Eckart<sup>4</sup>, Ashley M. Deacon<sup>2,3,\*</sup>, and Lucy Shapiro<sup>1,\*</sup>**<sup>1</sup>Department of Developmental Biology, Stanford University School of Medicine, Stanford, CA, 94305<sup>2</sup>Stanford Synchrotron Radiation Lightsource, SLAC National Accelerator Laboratory, Menlo Park, CA, 94025<sup>3</sup>Joint Center for Structural Genomics<sup>4</sup>Stanford Protein and Nucleic Acid Facility, Stanford University School of Medicine, Beckman Center, Stanford, CA 94305<sup>5</sup>Present address: Department of Chemistry, Williams College, Williamstown, MA 01267<sup>#</sup>Authors contributed equally to this work.\*Correspondence: adeacon@slac.stanford.edu (A.M.D.); shapiro@stanford.edu, Tel. (+1) 650 725 7678, Fax (+1) 650 725 7739 (L.S.)

---

Inventory of Supplemental Information:

**SUPPLEMENTAL FIGURES**

Fig. S1, related to Fig. 2

Fig. S2, related to Fig. 3

Fig. S3, related to Fig. 4

Fig. S4, related to Fig. 2,6

Fig. S5, related to Fig. 5

Table S1, related to Fig. 4

Supplemental Structural Analysis

Supplemental Experimental Procedures

References

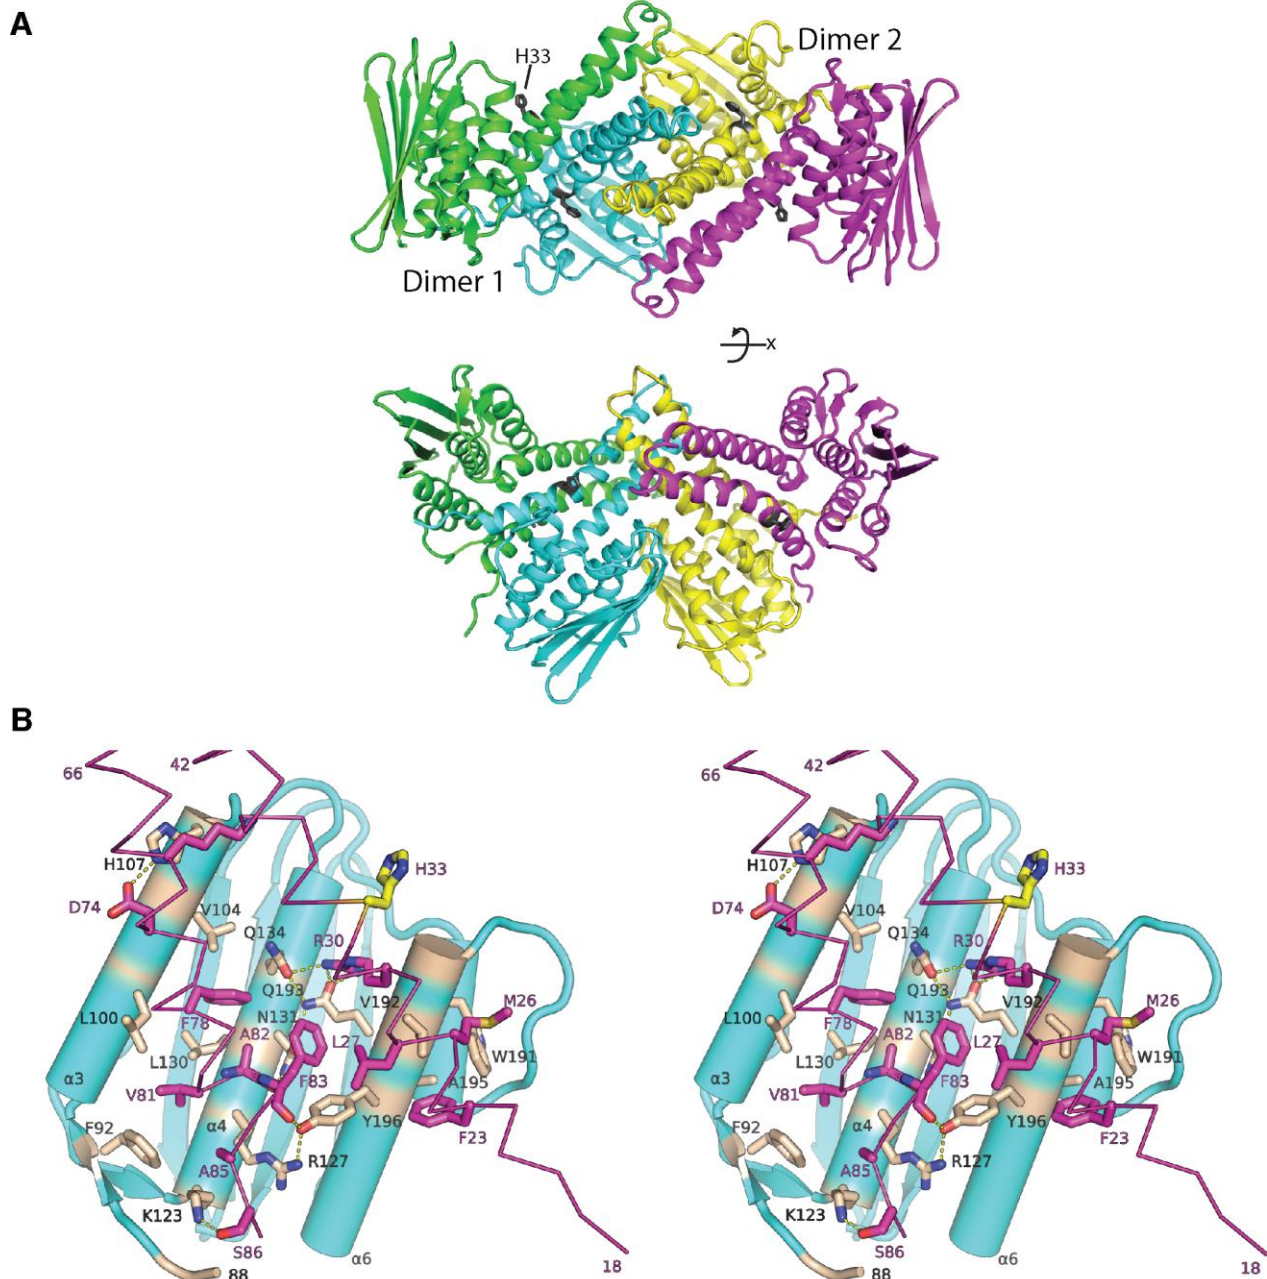

**FIGURE S1.** (A) The two ChpT dimers in the asymmetric unit. Each chain is shown in a different color, and the phosphorylatable His33 is shown as gray sticks. (B) Stereoview of the ChpT. Inter-helical interactions dominate the DHp-CA domain interface (DHp, magenta and CA, cyan).

A

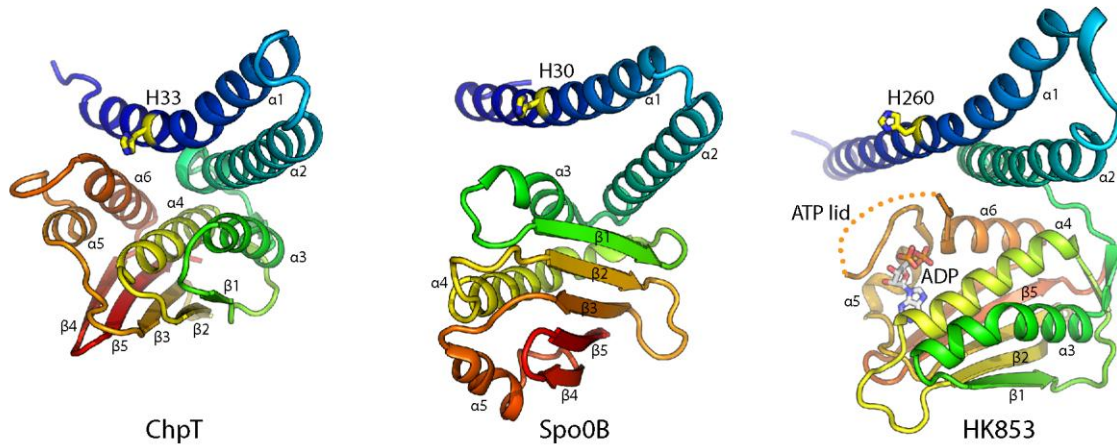

B

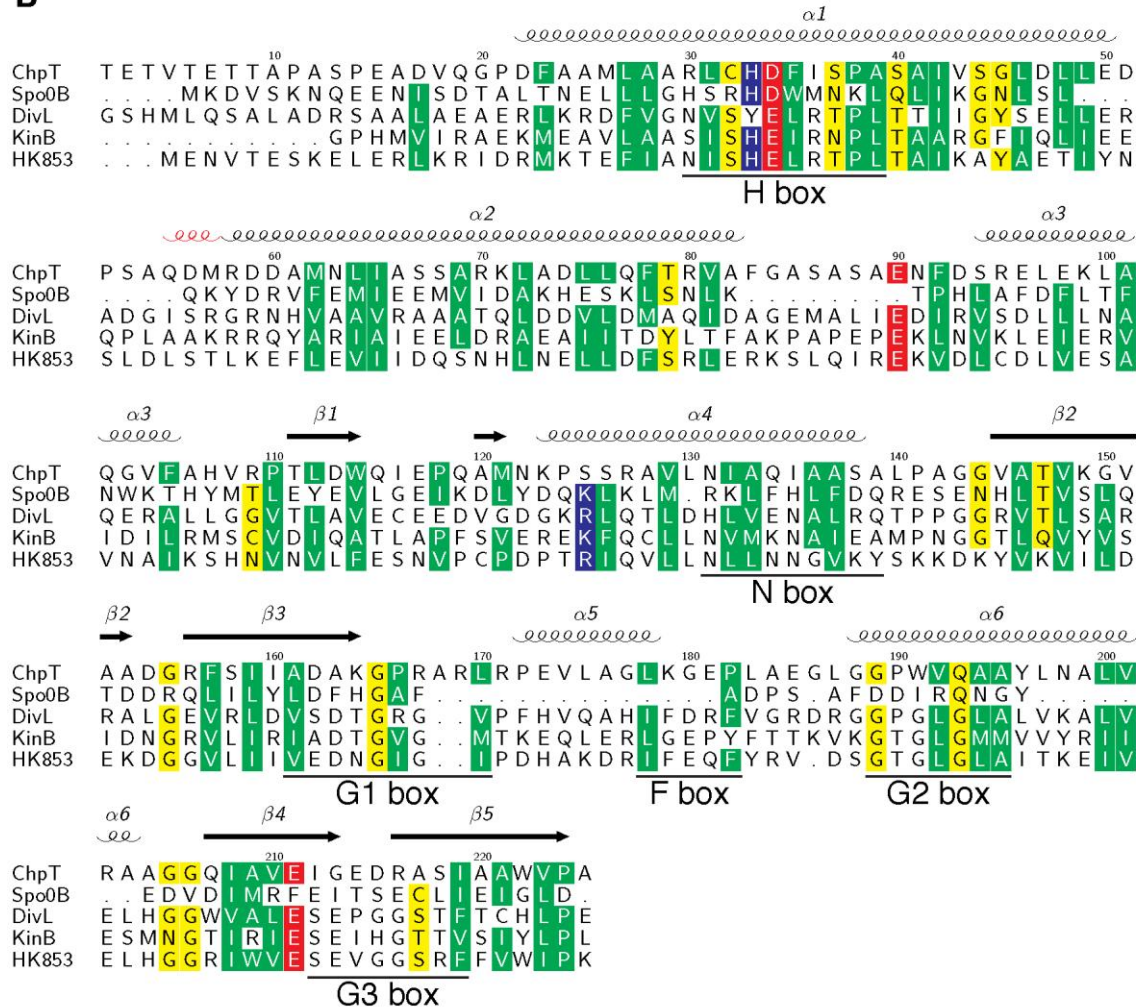

**FIGURE S2.** A comparison of structurally related phosphosignaling proteins. A. ChpT, Spo0B (PDB ID 1ixm), and HK853 (PDB ID 2c2a) are shown in similar orientations. Each structure is colored in a color-gradient ranging from blue (N-term) to red (C-term). The phosphorylatable histidine and ADP in HK853 are drawn as sticks. B. Sequence alignment of HPTs (ChpT and Spo0B), a pseudo-HK (DivL, which does not have a phosphorylatable histidine), and HKs (KinB and HK853). The locations for the HK sequence motifs (H, N, G1, F, G2, and G3 boxes) are marked at the bottom, while the secondary structures of ChpT are shown at the top. Conserved residues

are highlighted in colors (red, acidic; blue, basic; yellow, polar uncharged and green, hydrophobic nonpolar).

**A**

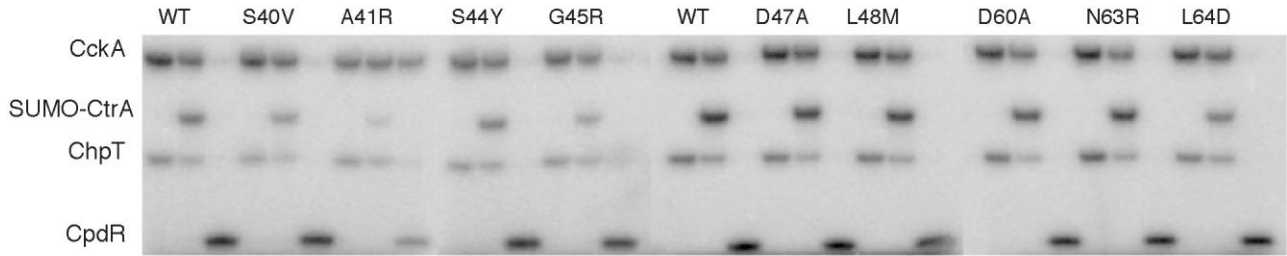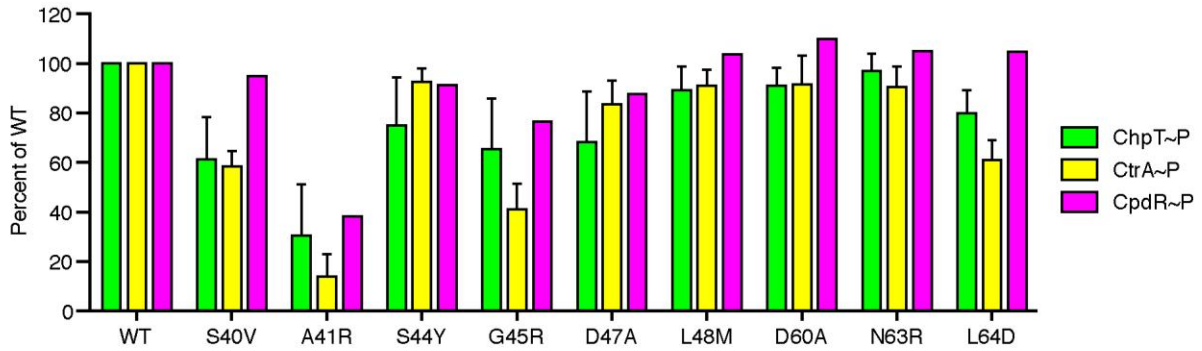

**B**

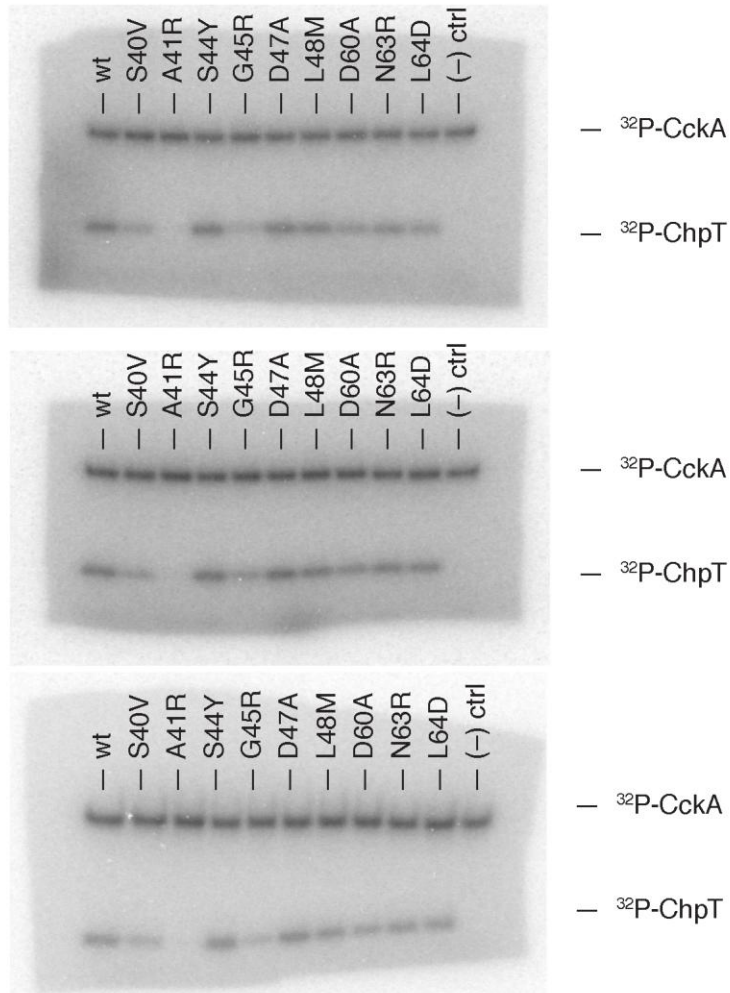

**FIGURE S3.** (A) Overall phosphorelay output for each mutant. Upper panel: three reaction mixtures with  $[\gamma\text{-}^{32}\text{P}]$

ATP for 30 minutes were analyzed: (1) CckA, ChpT, (2) CckA, ChpT, and SUMO-CtrA, and (3) CckA, ChpT, and CpdR. The phosphoproteins were separated by SDS-PAGE and imaged by phosphor storage. Lower panel: quantitation of three replicate phosphotransfer assays (upper panel) and standard deviation for each band. (B) Phosphotransfer assay gels of CckA and ChpT in triplicate. CckA~P autophosphorylated with [ $\gamma$ - $^{32}$ P] ATP was mixed with each ChpT variant and allowed to react for 10s before being stopped. The phosphoproteins were separated by PAGE and imaged by phosphor storage. The negative control lane was a reaction mixture containing [ $\gamma$ - $^{32}$ P] autophosphorylated CckA~P without added ChpT. Shown are the entire gels for three individual experiments.





**FIGURE S4.** (A) A structure-based sequence alignment of the DHP domains of ChpT and several HKs guide the design of point mutations along the DHP-RR binding interface. Highlighted in red is the phosphorylatable histidine residue. Highlighted in blue are the residues identified by Skerker *et al.* (Skerker et al., 2008) among EnvZ, RstB, CpxA, and HK853 as responsible for maintaining selectivity for cognate RRs. Highlighted in yellow are the putative ChpT residues believed to control selectivity for its RRs. Residues above arrows are the point mutations generated at that that site for ChpT. (B) Sequence alignment of the RDs of the ChpT cognate signaling partners with OmpR. The secondary structures of OmpR (PDB ID 1kgs) are shown below the sequences. Conserved residues are highlighted in colors (red, acidic; blue, basic; yellow, polar uncharged and green, hydrophobic nonpolar). (C) Wavelength scan circular dichroism of six ChpT variants reveals that each protein is well folded and displays similar secondary structure features.



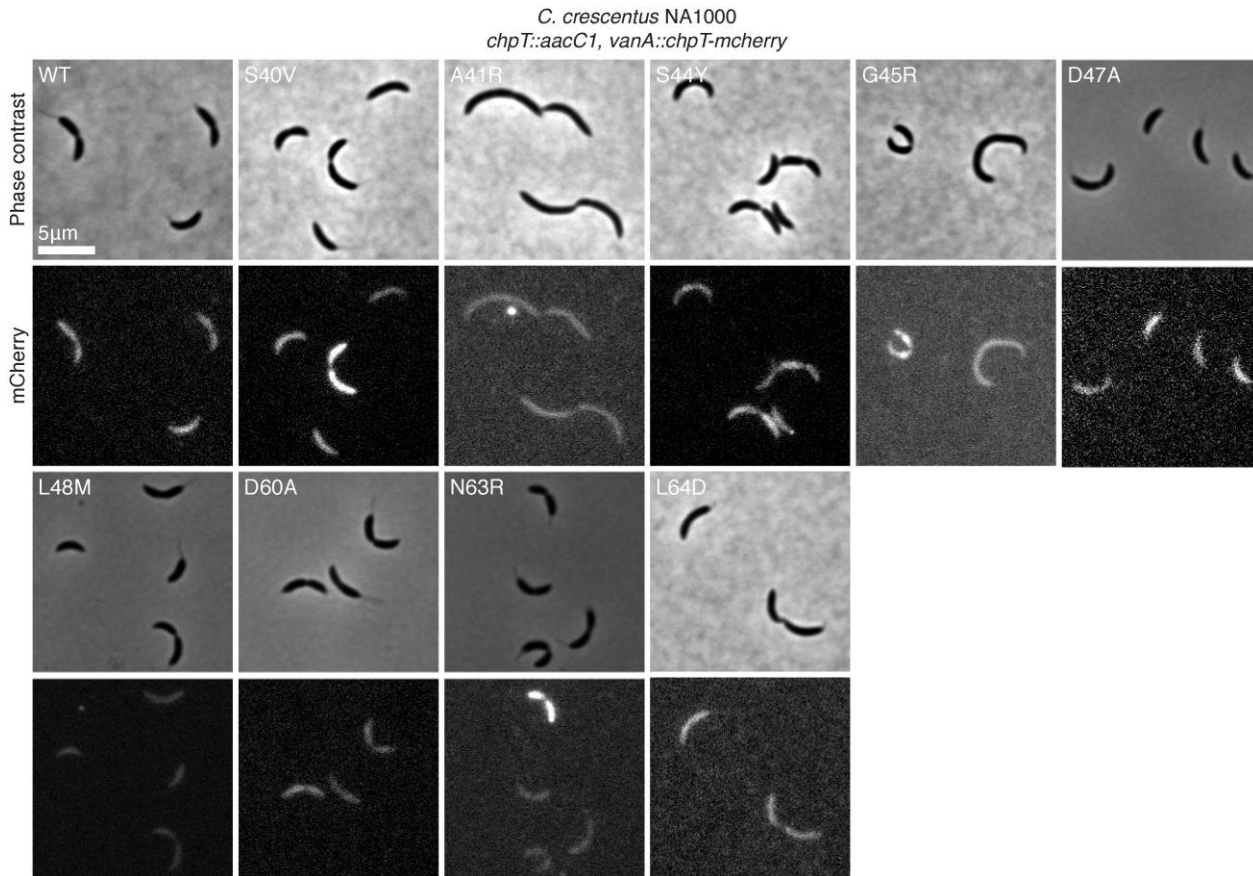

**FIGURE S5.** ChpT is diffuse throughout the cell. Fluorescence light microscopy images of *C. crescentus* NA1000 strains whose sole ChpT copy is either wild-type ChpT or a ChpT variant harboring a point mutation in the RR binding region of ChpT. Phase contrast and mCherry-fluorescence images are shown.

## SUPPLEMENTAL STRUCTURAL ANALYSIS

*Domain interface between CA and DHp*—The inter-domain arrangement between the CA domain and the DHp domain differs significantly between ChpT and related proteins such as Spo0B and HK853 (Fig. S2). The interface between the CA and DHp domains in ChpT is mediated by helical interactions (Fig. S1B) and buries a total surface area of  $\sim 900 \text{ \AA}^2$ . The interactions are mainly hydrophobic involving the N-terminal section of  $\alpha 1$  (Phe23, Met26, Leu27) and the C-terminal section of  $\alpha 2$  (Leu75, Phe78, Val81, Ala82, Phe83 and Ala85) from DHp, and helices  $\alpha 3$ ,  $\alpha 4$ , and  $\alpha 6$  from CA. Hydrogen bonds also contribute significantly to the domain interface (residues Arg30, Gln134, Gln193, Asn131, Asp74, His107, Tyr196, Arg127, Ser86 and Lys123). Most of the residues involved in the domain interface are highly conserved among ChpT orthologs (Fig. 2B).

## SUPPLEMENTAL EXPERIMENTAL PROCEDURES

*Materials*—Unless otherwise stated, all chemicals were purchased from Sigma Aldrich and used directly without further purification. Restriction and DNA-modifying enzymes were purchased from New England Biolabs or Fermentas. PCR reactions were performed in 50  $\mu\text{L}$  reaction mixtures containing 5% (v/v) DMSO, 0.2  $\mu\text{M}$  each primer, and 0.2 mM each dNTP, and either KOD polymerase (Novagen) or Phusion HS II DNA Polymerase (Thermo Scientific) was used. Site-directed mutagenesis was performed using the protocols described in the QuikChange mutagenesis kit (Agilent Technologies) with the following changes: Pfu Ultra polymerase

(Agilent Technologies) was used in 50  $\mu$ L reaction mixtures containing 5% (v/v) DMSO, 0.2  $\mu$ M each primer, and 0.2 mM each dNTP, and a 55°C annealing temperature was used. Oligonucleotides were synthesized by the Stanford PAN Facility, and all DNA sequencing reactions were performed by Sequetech (Mountain View, CA). Antibiotic concentrations used in liquid growth selection of *E. coli*: kanamycin sulfate (30  $\mu$ g/mL) and chloramphenicol (20  $\mu$ g/mL). Antibiotic concentrations used in liquid growth selection of *Caulobacter crescentus*: kanamycin sulfate (5  $\mu$ g/mL) and gentamycin (1  $\mu$ g/mL). Radiolabeling experiments with [ $\gamma$ - $^{32}$ P] ATP were conducted with 6000Ci/mmol 10mCi/ml EasyTides solution (Perkin Elmer). The plasmids, strains, and oligonucleotides used in this study are listed in Tables S2, S3, and S4, respectively.

*ChpT Cloning, Expression, and Purification*—A fragment of genomic sequence containing *chpT* was amplified from *Caulobacter crescentus* genomic DNA (gift from M. Schwartz) using primers JABp69 and JABp68 and cloned at the NdeI and SacI restriction sites into the bacterial expression vector pET-28b(+) (Novagen), which encodes an N-terminal His<sub>6</sub>-tag and a thrombin cleavage site. These steps produced plasmid pJAB29, which contains the full, misannotated *chpT* gene as reported in the *Caulobacter crescentus* CB15 genome (Nierman et al., 2001). Chen *et al.* demonstrated that ChpT protein produced in *Caulobacter crescentus* starts at Methionine-29, as annotated in the CB15 genome (Chen et al., 2010); these results were independently confirmed by Christen and co-workers (Christen et al., 2011). To produce ChpT of the correct length, *chpT* was subcloned from pJAB29 using primers JABp72 and JABp69 into pET-28b(+) at the NdeI and SacI restriction sites to yield plasmid pJAB30. Sequence verified pJAB30 was transformed into the Rosetta(DE3) pLysS *E. coli* expression strain (Novagen) to produce strain JAB75. A single colony of JAB75 was used to inoculate 50 mL of LB broth supplemented with kanamycin sulfate (30  $\mu$ g/mL) and chloramphenicol (20  $\mu$ g/mL) that was grown overnight at 37°C in a shaking incubator. The following morning, 20 mL of the overnight culture was used to inoculate 2 L of LB broth supplemented with kanamycin sulfate (30  $\mu$ g/mL) and chloramphenicol (20  $\mu$ g/mL) and grown at 37°C in a shaking incubator to an optical density of 0.6, as measured by absorbance at 600 nm. The culture was transferred to 25°C, and ChpT expression was induced by addition of IPTG (isopropyl-beta-D-thiogalactopyranoside) to 333  $\mu$ M. After four hours, the cells were harvested by centrifugation (3700  $\times$  g, 4°C, 20 min), resuspended in 4°C PBS pH 7.4, harvested by centrifugation (3700  $\times$  g, 4°C, 20 min), and the wet cell pellet stored at -80°C until use. Frozen cell pellets were thawed on ice and resuspended in 25 mL lysis buffer (50 mM HEPES-KOH pH 8.0 at 20°C, 500 mM KCl, 25 mM imidazole, 10% (v/v) glycerol, 1 mM DTT, 250U Benzonase nuclease (Sigma), SigmaFast protease inhibitor cocktail (Sigma)). Cells were lysed using three passes through a French Press (20000 psi, 4°C), and the insoluble cell debris was removed by centrifugation (29500  $\times$  g, 4°C, 30 min). His<sub>6</sub>-ChpT protein was affinity purified in batch: 3 mL 50% slurry of Ni-NTA agarose affinity resin (Qiagen) equilibrated in lysis buffer was incubated with the soluble, cleared lysate at 4°C for 60 min, the slurry was applied to a chromatography column, the resin bed was washed with 120 mL Ni-NTA wash buffer (50 mM HEPES-KOH pH 8.0 at 20°C, 500 mM KCl, 25 mM imidazole, 10% (v/v) glycerol, 1 mM DTT), and the protein was eluted with 10 mL Ni-NTA elution buffer (50 mM HEPES-KOH pH 8.0 at 20°C, 500 mM KCl, 250 mM imidazole, 10% (v/v) glycerol, 1 mM DTT) directly into an Amicon-Ultra 15mL 10k MWCO concentrator. The eluted protein solution was concentrated to 2.5 mL by centrifuge ultrafiltration (3700  $\times$  g, 4°C, 30 min) and buffer exchanged into CleanCleave buffer (50 mM Tris-HCl pH 8.0, 100 mM NaCl, 10 mM CaCl<sub>2</sub>, 10% (v/v) glycerol) using a PD-10 desalting column (GE Healthcare) that yields a final eluted volume of 3.5 mL. Removal of the His<sub>6</sub>-tag was achieved by incubating the protein solution with 1 mL of 50% slurry of solid-supported thrombin (CleanCleave thrombin kit, Sigma) equilibrated in CleanCleave buffer at 4°C overnight on a rocking platform, applying the slurry to a chromatography column the next morning and collecting the eluate. Undigested His<sub>6</sub>-ChpT was removed by subtractive Ni-NTA agarose affinity purification: 1 mL 50% slurry Ni-NTA agarose (Qiagen) equilibrated in CleanCleave buffer was incubated with the protein solution for 1 h, the slurry was applied to a chromatography column, and the eluate was collected. The eluate was concentrated to 1.5 mL by centrifuge ultrafiltration (3700  $\times$  g, 4°C) using an Amicon Ultra 15 10 k MWCO, and purified by size exclusion chromatography on a HiPrep 16/60 Sephacryl S-200 HR column (GE Healthcare) equilibrated in kinase storage buffer (50 mM HEPES-KOH pH 8.0 at 20°C, 200 mM KCl, 10% (v/v) glycerol, 0.1 mM EDTA, 1 mM DTT) to yield approximately 33 mg of purified ChpT from 2 L of bacterial culture. Removal of the His<sub>6</sub>-tag was confirmed by western blot using the HisProbe (Pierce) affinity reagent, which specifically binds to the His<sub>6</sub>-tag. The protein was concentrated by centrifuge ultrafiltration (3700  $\times$  g, 4°C) using an Amicon Ultra 15 10 k MWCO to 13 mg/mL, flash frozen in liquid nitrogen and stored at -80°C. The protein concentration was determined by

measuring absorbance at 280 nm and using the calculated molar extinction coefficient of  $18115 \text{ cm}^{-1} \text{ M}^{-1}$ . The calculated molecular weight of this construct is 23649 Da.

His<sub>6</sub>-ChpT variants containing point mutations in the putative RD binding region of the ChpT DHp domain were generated by Quikchange mutagenesis of pJAB30 using protocols described above. Primers used are as follows: S40V (JABp115, JABp116); A41R (JABp117, JABp118); S44Y (JABp119, JABp120); G45R (JABp121, JABp122); D47A (JABp123, JABp124); L48M (JABp125, JABp126); D60A (JABp127, JABp128); N63R (JABp129, JABp130); L64D (JABp131, JABp132). Purified plasmids were sequence-verified, transformed in to Rosetta(DE3) pLysS *E. coli* (strains JAB134-JAB139, JAB143-JAB145), and expressed and purified as described above except for the following changes: following the initial Ni-NTA affinity purification, the proteins were exchanged in to kinase storage buffer (50 mM HEPES·KOH pH 8.0 at 20°C, 200 mM KCl, 10% (v/v) glycerol, 0.1 mM EDTA, 1 mM DTT) using PD-10 desalting columns (GE Healthcare), concentrated by centrifuge ultrafiltration ( $3700 \times g$ , 4°C) using an Amicon Ultra 15 10 k MWCO to approximately 10 mg/mL, flash frozen in liquid nitrogen, and stored at -80°C.

*CckA Cloning, Expression, and Purification*—The cytoplasmic region of CckA, CckA<sub>70-691</sub>, was subcloned from pNJH87 using primers JABp64 and JABp66 into pET-28b(+) (Novagen) at NdeI and SacI restriction sites. These steps produced plasmid pJAB27, which was sequence verified and used to transform chemically competent Rosetta(DE3) pLysS *E. coli* cells (Novagen) to produce strain JAB70. A single colony of JAB70 was used to inoculate 50 mL of LB broth supplemented with kanamycin sulfate (30 µg/mL) and chloramphenicol (20 µg/mL) that was grown overnight at 37°C in a shaking incubator. The following morning, 20 mL of the overnight culture was used to inoculate 2 L of LB broth supplemented with kanamycin sulfate (30 µg/mL) and chloramphenicol (20 µg/mL) and grown at 37°C in a shaking incubator to an optical density of 0.6, as measured by absorbance at 600 nm. The culture was transferred to 25°C, and CckA<sub>70-691</sub> expression was induced by addition of IPTG (isopropyl-beta-D-thiogalactopyranoside) to 333 µM. After five hours, the cells were harvested by centrifugation ( $3700 \times g$ , 4°C, 20 min), resuspended in 4°C PBS pH 7.4, harvested by centrifugation ( $3700 \times g$ , 4°C, 20 min), and stored at -80°C until use. Frozen cell pellets were thawed on ice and resuspended in 25 mL lysis buffer (50 mM HEPES·KOH pH 8.0 at 20°C, 500 mM KCl, 25 mM imidazole, 10% (v/v) glycerol, 1 mM DTT, 250U Benzonase nuclease (Sigma), SigmaFast protease inhibitor cocktail (Sigma)). Cells were lysed using four passes through a French Press (20000 psi, 4°C), and the insoluble cell debris was removed by centrifugation ( $29500 \times g$ , 4°C, 30 min). His<sub>6</sub>-CckA<sub>70-691</sub> protein was affinity purified in batch: 4 mL 50% slurry of Ni-NTA agarose affinity resin (Qiagen) equilibrated in lysis buffer was incubated with the soluble, cleared lysate at 4°C for 60 min, the slurry was applied to a chromatography column, the resin bed was washed with 120 mL Ni-NTA wash buffer (50 mM HEPES·KOH pH 8.0 at 20°C, 500 mM KCl, 25 mM imidazole, 10% (v/v) glycerol, 1 mM DTT) and the protein was eluted with 10 mL Ni-NTA elution buffer (50 mM HEPES·KOH pH 8.0 at 20°C, 500 mM KCl, 250 mM imidazole, 10% (v/v) glycerol, 1 mM DTT). The eluted protein solution was buffer exchanged into QA buffer (50 mM Tris·HCl pH 8.0, 50 mM KCl 10% (v/v) glycerol) using four PD-10 desalting columns (GE Healthcare). The protein solution was purified by anion exchange chromatography: the sample was applied to a 1 mL HiTrap Q Sepharose FF column equilibrated in QA buffer using a GP-250 FPLC gradient programmer (Pharmacia, now GE Healthcare) equipped with dual P-500 pumps (Pharmacia, now GE Healthcare), the column was washed with 10 column volumes of QA buffer, the protein was eluted with a linear gradient of QB buffer (50 mM Tris·HCl pH 8.0, 1 M KCl 10% (v/v) glycerol) from 0 to 100% QB, and peak fractions containing His<sub>6</sub>-CckA<sub>70-691</sub> were pooled. The sample was concentrated to 1.5 mL by centrifuge ultrafiltration ( $3700 \times g$ , 4°C) with an Amicon Ultra 4 30k MWCO (Millipore) and purified by size exclusion chromatography on a HiPrep 16/60 Sephacryl S-200 HR column (GE Healthcare) equilibrated in kinase storage buffer (50 mM HEPES·KOH pH 8.0 at 20°C, 200 mM KCl, 10% (v/v) glycerol, 0.1 mM EDTA, 1 mM DTT) using a GP-250 FPLC gradient programmer (Pharmacia, now GE Healthcare) equipped with dual P-500 pumps (Pharmacia, now GE Healthcare) to yield approximately 6.8 mg of purified His<sub>6</sub>-CckA<sub>70-691</sub> from 2 L of bacterial culture. The protein was concentrated by centrifuge ultrafiltration ( $3700 \times g$ , 4°C) using an Amicon Ultra 15 10 k MWCO to 4.5 mg/mL, flash frozen in liquid nitrogen and stored at -80°C. Protein purity was assessed to be >95% pure by Coomassie-stained polyacrylamide gel electrophoreses. The protein concentration was determined by measuring absorbance at 280 nm and using the calculated molar extinction coefficient of  $28880 \text{ cm}^{-1} \text{ M}^{-1}$ . The calculated molecular weight of this construct is 68505 Da.

A variant of CckA unable to undergo autophosphorylation, His<sub>6</sub>-CckA<sub>70-691</sub>-H322A, was generated using the

megaprimer method as described by Ke and Madison (Ke and Madison, 1997). The initial round of amplification used primers JABp85 and JABp88 in a reaction containing the following components: 26.5  $\mu$ L nuclease free water, 10  $\mu$ L 5 $\times$  QC buffer, 5  $\mu$ L mixture of 2 mM each dNTPs (EMD Millipore), 5  $\mu$ L pJAB27 diluted 1:20 with EB from a 5 mL culture miniprep, 1.5  $\mu$ L 100  $\mu$ M JABp85, 1.5  $\mu$ L 10  $\mu$ M JABp88, 2.5  $\mu$ L DMSO and 0.5  $\mu$ L Phusion HS II DNA Polymerase (Thermo Scientific). The PCR was initiated by melting at 98°C for 3 min, followed by 25 cycles of melting at 98°C for 30 s, annealing at 55 °C for 30 s, and extension at 72 °C for 30s, followed by extension at 72 °C for 5 min and stored at 4°C overnight. To the resulting PCR product was added 1.5  $\mu$ L 100  $\mu$ M JABp86, 2.5  $\mu$ L mixture of 2 mM each dNTPs (EMD Millipore) and 0.5  $\mu$ L Phusion HS II DNA Polymerase (Thermo Scientific), and PCR was initiated by melting at 98°C for 1 min, followed by 25 cycles of melting at 98°C for 30 s, annealing and extension at 72°C for 55s, followed by extension at 72 °C for 5 min. The resulting PCR product was cloned into pET-28b(+) (Novagen) at the NcoI and SacI sites. These steps produced plasmid pJAB35, which encodes *cckA*<sub>71-691</sub>-H322A with a C-terminal His<sub>6</sub>-tag. The expression plasmid for His<sub>6</sub>-CckA<sub>70-691</sub>-H322A, pJAB36, was generated by subcloning *cckA*<sub>70-691</sub>-H322A from pJAB35 using the protocol described above for generation of pJAB27 with primers JABp64 and JABp66. His<sub>6</sub>-CckA<sub>70-691</sub>-H322A was expressed from strain JAB90 (Rosetta(DE3) pLysS *E. coli* transformed with pJAB36) and purified as described above for His<sub>6</sub>-CckA<sub>70-691</sub>. A calculated molar extinction coefficient of 28880 cm<sup>-1</sup> M<sup>-1</sup> was used for protein concentration measurements at 280 nm, and the calculated molecular weight of this construct is 68439 Da.

The CckA receiver domain, CckA-RD (aa 571–691), was subcloned from pNJH87 using primers JABp65 and JABp66 into pET-28b(+) (Novagen) at NdeI and SacI restriction sites. These steps produced plasmid pJAB28, which was sequence verified and used to transform chemically competent Rosetta(DE3) pLysS *E. coli* cells (Novagen) to produce strain JAB73. CckA-RD was expressed and purified from a 2L culture of strain JAB73 using the same methods described for ChpT purification. Briefly, these steps included Ni-NTA affinity purification, overnight cleavage of the His<sub>6</sub>-tag with CleanCleave thrombin (Sigma), subtractive Ni-NTA affinity purification, and gel filtration to produce 15 mg CckA-RD. The purified CckA-RD was concentrated to 10 mg/mL using an Amicon Ultra 15 10 k MWCO concentrator, flash frozen in liquid nitrogen and stored at –80°C. A calculated molar extinction coefficient of 4470 cm<sup>-1</sup> M<sup>-1</sup> was used for protein concentration measurements at 280 nm, and the calculated molecular weight of this construct is 13430 Da. To generate FLAG-CckA(70–691) the FLAG peptide sequences was embedded within PCR primers WScp29 and CckA(70–691) was amplified using primers WScp29 and WScp30 and pET-28b(+) (Novagen) at NdeI and SacI restriction sites to generate expression vector pWSC19. FLAG-CckA was subsequently expressed and purified as described above.

*CpdR Expression and Purification*—CpdR was expressed and purified using methods similar to those described by Abel *et al.* (Abel *et al.*, 2011). Strains BPC223 and BPC250 were kind gifts from Peter Chien (UMass Amherst) (Abel *et al.*, 2011).

Plasmid pET28b-*ulp1*, which is used to express the catalytic domain of SUMO protease as a C-terminally-tagged His<sub>6</sub> fusion, was purified by miniprep from strain BPC250, an *E. coli* DH5 $\alpha$  strain harboring pET28b-*ulp1* (Wang *et al.*, 2007). Plasmid pET28b-*ulp1* was used to transform chemically competent Rosetta(DE3) pLysS *E. coli* cells (Novagen) to produce strain JAB141. SUMO-His<sub>6</sub> protease was expressed and purified from a 2L culture of strain JAB141 using similar methods described for ChpT with the following changes: SUMO-His<sub>6</sub> protease was purified by Ni-NTA affinity purification; buffer exchanged using two PD-10 desalting columns (GE Healthcare) into 7 mL of 40 mM Tris·HCl pH 8.0, 300 mM NaCl, 2 mM EDTA; protein concentration of 6.7 mg/mL was determined by Bradford reagent (Sigma) using BSA as a standard; diluted with 7 mL of 40 mM Tris·HCl pH 8.0, 300 mM NaCl, 2 mM EDTA and 14 mL of glycerol to provide 28 mL of 1.7 mg/mL SUMO-His<sub>6</sub> protease in 20 mM Tris·HCl pH 8.0, 150 mM NaCl, 1 mM EDTA, 50% (v/v) glycerol, which was stored at –80°C until use.

His<sub>6</sub>-SUMO-CpdR was expressed directly from strain BPC223, a BL21(DE3) *E. coli* strain harboring plasmid pSUMO-His<sub>6</sub>-CpdR (pET-23b derivative; *cpdR* 5' fused to a his<sub>6</sub> tagged SUMO domain), as described above for the ChpT protein. His<sub>6</sub>-SUMO-CpdR was expressed and purified from 5 L of BPC223 culture similar to reported methods (Abel *et al.*, 2011). A soluble lysate was prepared by resuspending the harvested, frozen cell pellet in 50 mL lysis buffer (50 mM HEPES-KOH pH 8.0 at 20°C, 500 mM KCl, 25 mM imidazole, 10% (v/v) glycerol, 1 mM DTT, 250U Benzonase nuclease (Sigma), SigmaFast protease inhibitor cocktail (Sigma)), lysing the cells with three passes through an Emulsiflex C5, 4°C, and removing the insoluble cell debris by centrifugation (29500  $\times$  g, 4°C, 30 min). His<sub>6</sub>-SUMO-CpdR protein was affinity purified in batch: 8 mL 50% slurry of Ni-NTA agarose

affinity resin (5Prime) equilibrated in lysis buffer was incubated with the soluble, cleared lysate at 4°C for 90 min, the slurry was applied to a chromatography column, the resin bed was washed with 125 mL Ni-NTA wash buffer (50 mM HEPES-KOH pH 8.0 at 20°C, 500 mM KCl, 25 mM imidazole, 10% (v/v) glycerol, 1 mM DTT) and the protein was eluted with 25 mL Ni-NTA elution buffer (50 mM HEPES-KOH pH 8.0 at 20°C, 500 mM KCl, 250 mM imidazole, 10% (v/v) glycerol, 1 mM DTT). The His<sub>6</sub>-SUMO tag was removed: to the eluted His<sub>6</sub>-SUMO-CpdR was added 1 mL of 1.7 mg/mL SUMO-His<sub>6</sub> protease and the solution was dialyzed overnight at 4°C in two 12 mL Slide-A-Lyzer 10 k MWCO dialysis cassettes against 2L dialysis buffer (20 mM HEPES-KOH pH 8.0, 100 mM KCl, 0.5 mM EDTA, 10% glycerol, 1 mM DTT). The following day, the His<sub>6</sub>-tagged proteins (uncut His<sub>6</sub>-SUMO-CpdR, His<sub>6</sub>-SUMO domain, and SUMO-His<sub>6</sub> protease) were removed by subtractive Ni-NTA affinity purification with 12 mL of 50% slurry of Ni-NTA agarose affinity resin (5Prime) equilibrated in dialysis buffer; the eluate containing cleaved CpdR was collected. The sample was concentrated to 6 mL by centrifuge ultrafiltration (3700 × g, 4°C) with a Vivaspin 20 concentrator 10k MWCO (GE Healthcare) and purified by size exclusion chromatography on a HiPrep 16/60 Sephacryl S-200 HR column (GE Healthcare) equilibrated in kinase storage buffer (50 mM HEPES-KOH pH 8.0 at 20°C, 200 mM KCl, 10% (v/v) glycerol, 0.1 mM EDTA, 1 mM DTT) using a GP-250 FPLC gradient programmer (Pharmacia, now GE Healthcare) equipped with dual P-500 pumps (Pharmacia, now GE Healthcare) to yield approximately 12.6 mg of purified CpdR from 5 L of bacterial culture. We note that most of the expressed protein forms high molecular weight aggregates that we were able to separate by size exclusion chromatography. The eluted fractions at the expected molecular weight for monomeric CpdR were run on an analytical size exclusion column as described below to ensure CpdR was monomeric. CpdR protein was concentrated by centrifuge ultrafiltration (3700 × g, 4°C) using a Vivaspin 20 concentrator 10k MWCO (GE Healthesare) to 9.7 mg/mL, flash frozen in liquid nitrogen and stored at -80°C. Protein purity was assessed to be >95% pure by Coomassie-stained polyacrylamide gel electrophoreses. The protein concentration was determined by measuring absorbance at 280 nm and using the calculated molar extinction coefficient of 5625 cm<sup>-1</sup> M<sup>-1</sup>. The calculated molecular weight of this construct is 12606 Da.

*CtrA Cloning, Expression, and Purification*—An expression plasmid for His<sub>6</sub>-SUMO-CtrA was derived from the pSUMO-His<sub>6</sub>-cpdR plasmid. *ctrA* gene was subcloned from pET28b-*ctrA* (Chien et al., 2007) using primers JABp144 and JABp145 to produce a *ctrA* with ligation independent cloning (LIC) overhangs reported by Weeks and co-workers (Weeks et al., 2007). Meanwhile, pSUMO-His<sub>6</sub>-cpdR was reverse amplified with primers JABp142 and JABp143, which produced a linear fragment of the pSUMO-His<sub>6</sub> vector without *cpdR* and with complementary LIC overhangs (Weeks et al., 2007), and this PCR mixture was subsequently DpnI-treated to digest remaining pSUMO-His<sub>6</sub>-cpdR plasmid DNA. Both the *ctrA* fragment and the linear pSUMO-His<sub>6</sub> vector fragment were purified by agarose gel electrophoresis and a QiaQuick gel extraction kit (Qiagen). These fragments were assembled by iso-thermal assembly using the Gibson method according to the protocols provided by the j5 manual (Hillson et al., 2012) (<http://j5.jbei.org/j5manual/pages/79.html>) and by Gibson *et al* (Gibson et al., 2009) to produce plasmid pJAB67, which was sequence-verified. Chemically competent Rosetta(DE3) pLysS *E. coli* were transformed with pJAB67 to produce expression strain JAB148. His<sub>6</sub>-SUMO-CtrA was expressed and purified from JAB148 using methods described above for the purification of the His<sub>6</sub>-ChpT variants.

*Phosphotransfer assays*—Phosphotransfer assays were performed as previously described (Biondi et al., 2006; Skerker et al., 2005). Briefly, phosphorylated CckA was generated by incubating 5 μM of His<sub>6</sub>-CckA<sub>70-691</sub> in kinase buffer (50 mM HEPES-KOH pH 8.0, 200 mM KCl, 0.1 mM EDTA, 10% (v/v) glycerol, and 1 mM DTT) supplemented with 0.5 mM ATP, 0.167 μCi/μL [ $\gamma$ -<sup>32</sup>P] ATP, 2 mM DTT, and 5 mM MgCl<sub>2</sub> at room temperature for 60 mins in a total reaction volume of 30 μL. Phosphotransfer from CckA to ChpT was measured by incubating 30 μL of 5 μM <sup>32</sup>P-phosphorylated His<sub>6</sub>-CckA<sub>70-691</sub> with 30 μL of 5 μM His<sub>6</sub>-ChpT or His<sub>6</sub>-ChpT variants in kinase buffer supplemented with 5 mM MgCl<sub>2</sub>. The reaction time was started upon addition of His<sub>6</sub>-ChpT or the His<sub>6</sub>-ChpT variants to the reaction mixture and allowed to proceed for 10s, at which time 8 μL of the reaction mixture was removed and quenched into 2 μL of 5× Laemmli Sample Buffer. Each reaction was loaded onto 12% Tris-HCl gels for PAGE, the proteins separated by electrophoresis, the radioactivity in the wet gels recorded on a phosphor storage plate for 3 hrs, and the images were recorded on a Typhoon fluorescence imager (Molecular Dynamics). Images files were opened in ImageJ software (Schneider et al., 2012), converted to 8-bit images, cropped, and saved as 8-bit png files. Quantitation of band intensity was measured using ImageJ: rectangular regions were drawn around each <sup>32</sup>P-ChpT variant band and a region on the gel corresponding to

background intensity; the integrated intensities of these regions were measured and normalized to the wild-type ChpT band. Band intensities from three individual experiments were averaged, and the mean intensity and standard deviation were plotted using Prism 5 software (GraphPad).

For phosphorelay reactions, 2.5  $\mu$ M His<sub>6</sub>-CckA<sub>70-691</sub> was mixed with 2.5  $\mu$ M His<sub>6</sub>-SUMO-CtrA or 2.5  $\mu$ M CpdR in kinase buffer (50 mM HEPES-KOH pH 8.0, 200 mM KCl, 0.1 mM EDTA, 10% (v/v) glycerol, and 1 mM DTT) supplemented with 0.5 mM ATP, 0.167  $\mu$ Ci/ $\mu$ L [ $\gamma$ -<sup>32</sup>P] ATP, 1 mM DTT, and 5 mM MgCl<sub>2</sub> and allowed to incubate for 30 minutes. Then 8  $\mu$ L of the reaction mixture was removed and quenched into 2  $\mu$ L of 5 $\times$  Laemmli Sample Buffer Reaction. The quenched reaction products were separated via gel electrophoresis on 4–20% Tris-HCl gradient gels and analyzed as described above.

*Analytical size exclusion chromatography*—A gel filtration standard (Bio-rad) containing Thyroglobulin (bovine),  $\gamma$ -globulin (bovine), ovalbumin (chicken), myoglobin (horse), and vitamin B12 were used to generate a molecular weight standard plot using a Superdex 200 10/300 GL column (GE Healthcare) equilibrated in kinase buffer (50 mM HEPES-KOH pH 8.0, 200 mM KCl, 0.1 mM EDTA, 10% (v/v) glycerol, and 1 mM DTT) and run with a 0.5 mL/min flow rate. Samples of His<sub>6</sub>-ChpT and each variant (approximately 50  $\mu$ L of a 2 mg/mL solution) were individually loaded onto the column and eluted. Each protein eluted at a volume corresponding to a His<sub>6</sub>-ChpT dimer. Error bars for molecular weight estimated as the full width at half maximum (FWHM) for the eluting peak. The data are summarized in Table S1.

*Construction of chpT::aacC1, chpT-mcherry substitution variants*—To isolate strains whose sole copy of *chpT* harbored point mutations, we first constructed the mereodiploid strain JAB114 (*vanA::chpT-mcherry*) by transforming wild-type *C. crescentus* NA1000 (Marks et al., 2010) with pJAB51, which was made by amplifying *chpT* from plasmid pJAB30 using primers JABp72 and JABp113 and subcloning the resulting fragment at the NdeI and SacI sites into pVCHYC-2 (Thanbichler et al., 2007), an integrating vector for placing C-terminal proteins fused to *mcherry* at the *vanA* locus, generating a kanamycin-resistant strain. Next, we constructed pJK390, an allelic replacement vector to replace native *chpT* with the *aacC1* gentamycin-resistance cassette. We amplified 500 base pair fragments flanking the *chpT* open reading frame from the *C. crescentus* NA1000 genome—one fragment contained the 500 base pairs preceding the *chpT* start codon and was amplified using JWKP406 and JWKP407 and the other fragment contained the 500 base pairs succeeding the *chpT* stop codon and was amplified using JWKP410 and JWKP411—and the *aacC1*-containing gentamycin-resistance cassette from the pBXMCS-4 shuttle vector using JWKP408 and JWKP409. The primers used to generate these fragments were designed using the j5 software suite (Hillson et al., 2012) (<http://j5.jbei.org/>) to contain homology to the pNPTS138 vector (M. R. Alley, unpublished) as well as to one another to facilitate iso-thermal assembly using the Gibson method. Purified, BamHI-restricted pNPTS138 and the PCR-amplified fragments were incubated according to the protocols provided by the j5 manual (<http://j5.jbei.org/j5manual/pages/79.html>) and by Gibson *et al* (Gibson et al., 2009), and the reaction products—plasmid pJK390—were transformed into DH5 $\alpha$  *E. coli*, generating strain JWK1428. Isolated colonies were then screened by PCR and proper assembly was confirmed by sequencing. To delete the native *chpT* allele in the genome of our *chpT* mereodiploid, we transformed JAB114 (*C. crescentus* NA1000 *vanA::chpT-mcherry*) with pJK390 and selected for gentamycin-resistant colonies. These isolates were then grown without selection and cells still containing integrated pJK390 (which contains the *sacB* open reading frame) were counter selected on media containing 3% sucrose and 0.5 mM vanillate. Individual colonies were then screened for the presence of the native *chpT* allele using the primers JWKP412 and JWKP413, yielding strain JWK1436 (*chpT::aacC1, vanA::chpT-mcherry*). This strain was then used to generate a  $\phi$ Cr30 lysate,  $\phi$ *chpT::aacC1*. Quikchange mutagenesis of pJAB51 was used to generate *chpT* variants containing point mutations in the DHP domain using methods described above for Quikchange mutagenesis of pJAB30. We isolated mereodiploid strains containing native *chpT* and *vanA::chpT-mcherry* S40V (JAB164), A41R (JAB165), S44Y (JAB166), G45R (JAB167), D47A (JWK1442), L48M (JWK1443), D60A (JWK1444), N63R (JWK1445), or L64D (JAB168) as before and then performed generalized transduction to generate *chpT::aacC1, vanA::chpT-mcherry* S40V (JWK1437), A41R (JWK1438), S44Y (JWK1439), G45R (JWK1440), D47A (JWK1450), L48M (JWK1451), D60A (JWK1452), N63R (JWK1453), or L64D (JWK1441).

*Microscopy*—*chpT::aacC1, vanA::chpT-mcherry* WT, S40V, A41R, S44Y, G45R, D47A, L48M, D60A, N63R, and L64D strains (JWK1436-JWK1441, JWK1450-1453) were cultured overnight in PYE supplemented



with 5  $\mu$ M vanillate and sub-cultured into fresh media for six hours or until they reached an OD600 of 0.4. Cell suspensions were then dried onto agarose pads (1.5% agarose in PYE) containing 5  $\mu$ M vanillate and imaged on a Leica DM 6000 B microscope with a HCX PL APO 100 $\times$ /1.40 Oil PH3 CS objective, Hamamatsu EM-CCD C9100 camera and Metamorph (Molecular Devices). Both phase-contrast and fluorescence images were recorded. The fluorescent channel for mCherry was excited with a Leica EL6000 metal halide light source coupled via a liquid light guide, and the following excitation and emission filters were used: Ex 562/40 nm, Em 624/40 nm. ChpT overexpression microscopy studies of *chpT-mCherry* and variants were conducted as before, but with the addition of 0.5 mM vanillate to the PYE growth media.

*Surface plasmon resonance (SPR) of CckA-ChpT interactions*—SPR experiments were designed to measure CckA-RD binding to immobilized His<sub>6</sub>-ChpT similar to methods described by Bell *et al.* (Bell *et al.*, 2010). Purified His<sub>6</sub>-ChpT, His<sub>6</sub>-ChpT-A41R, and His<sub>6</sub>-ChpT-G45R were immobilized on the Biacore CM5 sensor chips via an anti-His<sub>6</sub> antibody. The analyte used was the CckA receiver domain (CckA-RD, amino acids 571-691.) SPR experiments were performed on a Biacore 3000 system at 25°C using a flow rate of 30  $\mu$ l min<sup>-1</sup> in running buffer (50 mM HEPES-KOH pH 8.0, 200 mM KCl, 1 mM DTT). For each data set the signal in a control flow cell that lacked immobilized ligand was subtracted to account for non-specific binding and analyzed using the BIAevaluation software (Biacore).

*Sequence Logos and Molecular modeling*—We aligned ChpT, CckA, and CtrA alphaproteobacteria homologs (Brilli *et al.*, 2010), extracted the core HK-RR co-varying interaction residues as determined for canonical HK-RR pairs (Capra *et al.*, 2012a; Capra *et al.*, 2012b; Skerker *et al.*, 2008), and created sequence logos using Weblogo (Crooks *et al.*, 2004; Schneider and Stephens, 1990). RD homology models of CckA, CtrA, and CpdR were built based on the RD template of an OmpR/PhoB homolog from *Thermotoga maritima* (Buckler *et al.*, 2002) (PDB ID 1kgs). The template shares 38% sequence identities with the CtrA-RD using the WHAT IF program (Vriend, 1990), and the proposed ChpT recognition region (the  $\alpha$ 1 helix and the  $\beta$ 4- $\alpha$ 5 loop) are highly conserved in above models. For comparison, homology models were also generated using the I-TASSER server (Zhang, 2008). An initial molecular complex between ChpT and an RD was built based on the HK853/RR468 complex (Casino *et al.*, 2009) (PDB ID 3dge) by superposing the RD to RR468 and ChpT onto HK853-DHp. The crude complexes were then optimized using the ROSETTA software (Das and Baker, 2008) by rigid-body and side-chains adjustments.

*Circular dichroism of ChpT variants*—The CD spectra of 8  $\mu$ M His<sub>6</sub>-ChpT substrates in 20 mM Tris·HCl pH 8.0, 50 mM NaCl were recorded at 25°C using an AVIV Model 62A DS circular dichroism spectrometer (Aviv Associates, Lakewood, NJ) equipped with a Peltier temperature control unit using a 1 mm path length cuvette. CD spectra were the average of four scans from 190 to 260 nm with a step size of 2 nm, 1.5 nm band width, and signal averaged for 10 s. The protein concentration for each variant was determined by absorbance at  $\lambda$ =280 nm as described above for ChpT purification. Data were processed as described (Kelly *et al.*, 2005).

## SUPPLEMENTAL EXPERIMENTAL PROCEDURE TABLES

**TABLE S1.** ChpT and the ChpT variants are dimers in solution.

| His <sub>6</sub> -ChpT variant | Estimated MW gel filtration (kDa) |        | Calculated monomer MW (kDa) | Calculated dimer MW (kDa) |
|--------------------------------|-----------------------------------|--------|-----------------------------|---------------------------|
| WT                             | 60.7                              | ± 14.0 | 25.5                        | 51.1                      |
| S40V                           | 60.7                              | ± 6.6  | 25.5                        | 51.1                      |
| A41R                           | 64.1                              | ± 18.9 | 25.6                        | 51.2                      |
| S44Y                           | 57.5                              | ± 21.5 | 25.6                        | 51.2                      |
| G45R                           | 57.5                              | ± 21.5 | 25.6                        | 51.3                      |
| D47A                           | 54.4                              | ± 17.9 | 25.5                        | 51.0                      |
| L48M                           | 60.7                              | ± 15.6 | 25.5                        | 51.1                      |
| D60A                           | 60.7                              | ± 14.0 | 25.5                        | 51.0                      |
| N63R                           | 57.5                              | ± 25.3 | 25.6                        | 51.1                      |
| L64D                           | 60.7                              | ± 25.3 | 25.5                        | 51.1                      |

**TABLE S2.** Plasmids used in this study.

| Plasmid    | Description                                                                                                             | Reference  |
|------------|-------------------------------------------------------------------------------------------------------------------------|------------|
| pET-28b(+) | Bacterial expression vector encoding an N-terminal His <sub>6</sub> -tag and a thrombin cleavage site, Kan <sup>R</sup> | Novagen    |
| pJAB27     | pET28b- <i>cckA</i> <sub>70-691</sub> , Kan <sup>R</sup>                                                                | This study |
| pJAB28     | pET28b- <i>cckA</i> <sub>571-691</sub> , Kan <sup>R</sup>                                                               | This study |
| pJAB30     | pET28b- <i>chpT</i> , Kan <sup>R</sup>                                                                                  | This study |
| pJAB35     | pET28b- <i>cckA</i> <sub>71-691</sub> -H322A, Kan <sup>R</sup>                                                          | This study |
| pJAB36     | pET28b- <i>cckA</i> <sub>70-691</sub> -H322A, Kan <sup>R</sup>                                                          | This study |
| pJAB51     | pVCHYC2- <i>chpT</i> , Kan <sup>R</sup>                                                                                 | This study |
| pJAB53     | pET28a- <i>chpT</i> -S40V, Kan <sup>R</sup>                                                                             | This study |
| pJAB54     | pET28a- <i>chpT</i> -A41R, Kan <sup>R</sup>                                                                             | This study |
| pJAB55     | pET28b- <i>chpT</i> -S44Y, Kan <sup>R</sup>                                                                             | This study |
| pJAB56     | pET28b- <i>chpT</i> -G45R, Kan <sup>R</sup>                                                                             | This study |
| pJAB57     | pET28a- <i>chpT</i> -D47A, Kan <sup>R</sup>                                                                             | This study |
| pJAB58     | pET28b- <i>chpT</i> -L48M, Kan <sup>R</sup>                                                                             | This study |
| pJAB59     | pET28b- <i>chpT</i> -D60A, Kan <sup>R</sup>                                                                             | This study |
| pJAB60     | pET28b- <i>chpT</i> -N63R, Kan <sup>R</sup>                                                                             | This study |
| pJAB61     | pET28b- <i>chpT</i> -L64D, Kan <sup>R</sup>                                                                             | This study |
| pJAB67     | pSUMO-LIC- <i>ctrA</i> , Amp <sup>R</sup>                                                                               | This study |
| pJAB77     | pVCHYC2- <i>chpT</i> -S40V, Kan <sup>R</sup>                                                                            | This study |
| pJAB78     | pVCHYC2- <i>chpT</i> -A41R, Kan <sup>R</sup>                                                                            | This study |
| pJAB79     | pVCHYC2- <i>chpT</i> -S44Y, Kan <sup>R</sup>                                                                            | This study |
| pJAB80     | pVCHYC2- <i>chpT</i> -G45R, Kan <sup>R</sup>                                                                            | This study |
| pJAB81     | pVCHYC2- <i>chpT</i> -L64D, Kan <sup>R</sup>                                                                            | This study |
| pJAB82     | pVCHYC2- <i>chpT</i> -D47A, Kan <sup>R</sup>                                                                            | This study |
| pJAB83     | pVCHYC2- <i>chpT</i> -L48M, Kan <sup>R</sup>                                                                            | This study |
| pJAB84     | pVCHYC2- <i>chpT</i> -D60A, Kan <sup>R</sup>                                                                            | This study |

| Plasmid                              | Description                                                                                                                                 | Reference                       |
|--------------------------------------|---------------------------------------------------------------------------------------------------------------------------------------------|---------------------------------|
| pJAB85                               | pVCHYC2- <i>chpT</i> -N63R, Kan <sup>R</sup>                                                                                                | This study                      |
| pNJH87                               | pMT383- <i>cckA</i> (contains <i>cckA</i> (CC_1078) sequence cloned from CB15N genomic DNA at NdeI & EcoRI sites), Kan <sup>R</sup>         | (N. Hillson, unpublished)       |
| pWSC19                               | pET28b-FLAG- <i>cckA</i> <sub>70-691</sub> , Kan <sup>R</sup>                                                                               | This study                      |
| pNTPS138                             | Suicide vector containing <i>sacB</i> for gene deletions, Kan <sup>R</sup>                                                                  | (M. R. Alley, unpublished)      |
| pVCHYC-2                             | pP <sub>van</sub> - <i>mcherry</i> expression integration vector, Kan <sup>R</sup>                                                          | (Thanbichler and Shapiro, 2006) |
| pSUMO-His <sub>6</sub> - <i>cpdR</i> | pET-23b derivative; <i>cpdR</i> 5' fused to a his <sub>6</sub> tagged SUMO domain, Amp <sup>R</sup> , gift from Peter Chien (UMass Amherst) | (Abel et al., 2011)             |
| pET23b- <i>ulp1</i>                  | SUMO protease catalytic domain from <i>ulp1</i> cloned into pET-23b, Amp <sup>R</sup> , gift from Peter Chien (UMass Amherst)               | (Wang et al., 2007)             |

**TABLE S3.** Strains used in this study.

| Strain                           | Description                                                                             | Reference                          |
|----------------------------------|-----------------------------------------------------------------------------------------|------------------------------------|
| <i>C. crescentus</i> NA1000      | Laboratory <i>Caulobacter crescentus</i> strain                                         | (Marks et al., 2010)               |
| <i>E. coli</i> DH5α              | Bacterial cloning strain                                                                | Invitrogen                         |
| <i>E. coli</i> Rosetta(DE3)pLysS | Bacterial expression strain                                                             | Novagen                            |
| JAB70                            | <i>E. coli</i> Rosetta(DE3)pLysS + pJAB27[pET28b- <i>cckA</i> <sub>70-691</sub> ]       | This study                         |
| JAB73                            | <i>E. coli</i> Rosetta(DE3)pLysS + pJAB28[pET28b- <i>cckA</i> <sub>571-691</sub> ]      | This study                         |
| JAB75                            | <i>E. coli</i> Rosetta(DE3)pLysS + pJAB30[pET28b- <i>chpT</i> ]                         | This study                         |
| JAB90                            | <i>E. coli</i> Rosetta(DE3)pLysS + pJAB36[pET28b- <i>cckA</i> <sub>70-691</sub> -H322A] | This study                         |
| JAB134                           | <i>E. coli</i> Rosetta(DE3)pLysS + pJAB53[pET28a- <i>chpT</i> -S40V]                    | This study                         |
| JAB135                           | <i>E. coli</i> Rosetta(DE3)pLysS + pJAB54[pET28a- <i>chpT</i> -A41R]                    | This study                         |
| JAB136                           | <i>E. coli</i> Rosetta(DE3)pLysS + pJAB55[pET28b- <i>chpT</i> -S44Y]                    | This study                         |
| JAB137                           | <i>E. coli</i> Rosetta(DE3)pLysS + pJAB56[pET28b- <i>chpT</i> -G45R]                    | This study                         |
| JAB138                           | <i>E. coli</i> Rosetta(DE3)pLysS + pJAB57[pET28a- <i>chpT</i> -D47A]                    | This study                         |
| JAB139                           | <i>E. coli</i> Rosetta(DE3)pLysS + pJAB58[pET28b- <i>chpT</i> -L48M]                    | This study                         |
| JAB141                           | <i>E. coli</i> Rosetta(DE3)pLysS + pET23b- <i>ulp1</i>                                  | This study;<br>(Wang et al., 2007) |
| JAB143                           | <i>E. coli</i> Rosetta(DE3)pLysS + pJAB59[pET28b- <i>chpT</i> -D60A]                    | This study                         |
| JAB144                           | <i>E. coli</i> Rosetta(DE3)pLysS + pJAB60[pET28b- <i>chpT</i> -N63R]                    | This study                         |
| JAB145                           | <i>E. coli</i> Rosetta(DE3)pLysS + pJAB61[pET28b- <i>chpT</i> -L64D]                    | This study                         |
| JAB148                           | <i>E. coli</i> Rosetta(DE3)pLysS + pJAB67[pSUMO-LIC- <i>ctrA</i> ]                      | This study                         |
| JWK1428                          | <i>E. coli</i> DH5α + pJK390[pNTPS138( <i>chpT</i> UP, gentR, DN)]                      | This study                         |
| JWK1430                          | <i>C. crescentus</i> NA1000 <i>vanA::chpT-mcherry</i> WT                                | This study                         |
| JWK1431                          | <i>C. crescentus</i> NA1000 <i>vanA::chpT-mcherry</i> S40V                              | This study                         |
| JWK1432                          | <i>C. crescentus</i> NA1000 <i>vanA::chpT-mcherry</i> A41R                              | This study                         |
| JWK1433                          | <i>C. crescentus</i> NA1000 <i>vanA::chpT-mcherry</i> S44Y                              | This study                         |
| JWK1434                          | <i>C. crescentus</i> NA1000 <i>vanA::chpT-mcherry</i> G45R                              | This study                         |
| JWK1435                          | <i>C. crescentus</i> NA1000 <i>vanA::chpT-mcherry</i> L64D                              | This study                         |
| JWK1436                          | <i>C. crescentus</i> NA1000 <i>vanA::chpT-mcherry</i> WT, <i>chpT::aacCI</i>            | This study                         |
| JWK1437                          | <i>C. crescentus</i> NA1000 <i>vanA::chpT-mcherry</i> S40V, <i>chpT::aacCI</i>          | This study                         |
| JWK1438                          | <i>C. crescentus</i> NA1000 <i>vanA::chpT-mcherry</i> A41R, <i>chpT::aacCI</i>          | This study                         |

| Strain  | Description                                                                                                   | Reference           |
|---------|---------------------------------------------------------------------------------------------------------------|---------------------|
| JWK1439 | <i>C. crescentus</i> NA1000 <i>vanA::chpT-mcherry</i> S44Y, <i>chpT::aacCI</i>                                | This study          |
| JWK1440 | <i>C. crescentus</i> NA1000 <i>vanA::chpT-mcherry</i> G45R, <i>chpT::aacCI</i>                                | This study          |
| JWK1441 | <i>C. crescentus</i> NA1000 <i>vanA::chpT-mcherry</i> L64D, <i>chpT::aacCI</i>                                | This study          |
| JWK1446 | <i>C. crescentus</i> NA1000 <i>vanA::chpT-mcherry</i> D47A                                                    | This study          |
| JWK1447 | <i>C. crescentus</i> NA1000 <i>vanA::chpT-mcherry</i> L48M                                                    | This study          |
| JWK1448 | <i>C. crescentus</i> NA1000 <i>vanA::chpT-mcherry</i> D60A                                                    | This study          |
| JWK1449 | <i>C. crescentus</i> NA1000 <i>vanA::chpT-mcherry</i> N63R                                                    | This study          |
| JWK1450 | <i>C. crescentus</i> NA1000 <i>vanA::chpT-mcherry</i> D47A, <i>chpT::aacCI</i>                                | This study          |
| JWK1451 | <i>C. crescentus</i> NA1000 <i>vanA::chpT-mcherry</i> L48M, <i>chpT::aacCI</i>                                | This study          |
| JWK1452 | <i>C. crescentus</i> NA1000 <i>vanA::chpT-mcherry</i> D60A, <i>chpT::aacCI</i>                                | This study          |
| JWK1453 | <i>C. crescentus</i> NA1000 <i>vanA::chpT-mcherry</i> N63R, <i>chpT::aacCI</i>                                | This study          |
| BPC223  | <i>E. coli</i> BL21(DE3) pLysS + pSUMO-His <sub>6</sub> - <i>cpdR</i> , gift from Peter Chien (UMass Amherst) | (Abel et al., 2011) |
| BPC250  | <i>E. coli</i> DH5a + pET23b- <i>ulp1</i> , gift from Peter Chien (UMass Amherst)                             | (Wang et al., 2007) |

**TABLE S4.** Oligonucleotides used in this study.

| Primer  | Description          | Primer Sequence (5'–3')                     |
|---------|----------------------|---------------------------------------------|
| JABp64  | cckA-70_f            | GGCCTTGTcCATATgCGCGGCTCAGCGCTTCCGG          |
| JABp65  | cckA-571_f           | AGGAgtctCaGGCGCCCGACAGGTTCGCGAGCG           |
| JABp66  | cckA-691_r           | ACTGCgGAGcTCCTACGCCGCTGCAGCTGCTG            |
| JABp68  | amp_chpT_f           | CCAAGCataTGCgTTATTTTCTCCAAGCGC              |
| JABp69  | amp_chpT_r           | TgAgctcTTACGCCGGGACCCAG                     |
| JABp72  | chpT_M29_f           | CGCCcatATGACCGAGACCGTC                      |
| JABp85  | pET28-SacI-megapri_f | CAGCCGGATCTCAGTG                            |
| JABp86  | pET28-NcoI-megapri_r | TCGAGATCTCGATCCCCGCGAAATTAATACGACTCACT      |
| JABp88  | cckA-H322A-megari2_r | TCGCGgcCGACTTCAA                            |
| JABp113 | amp_chpT-M29         | ACGGAGagCTcgCGCCGGGACC                      |
| JABp115 | chpT_S40V_1          | CCCAGACGATGGCG <u>AC</u> GGCCGGACTGATGAAG   |
| JABp116 | chpT_S40V_2          | CTTCATCAGTCCGGCC <u>GT</u> CGCCATCGTCTCGGG  |
| JABp117 | chpT_A41R_1          | CAGCCCCGAGACGAT <u>G</u> CGGCTGGCCGGACTGATG |
| JABp118 | chpT_A41R_2          | CATCAGTCCGGCCAGCC <u>G</u> CATCGTCTCGGGCCTG |
| JABp119 | chpT_S44Y_1          | CAGCAGATCCAGGCC <u>AT</u> AGACGATGGCGCTGG   |
| JABp120 | chpT_S44Y_2          | CCAGCGCCATCGTCT <u>AT</u> TGGCCTGGATCTGCTG  |
| JABp121 | chpT_G45R_1          | CCAGCAGATCCAG <u>G</u> CGCGAGACGATGGCGC     |
| JABp122 | chpT_G45R_2          | GCGCCATCGTCTCG <u>G</u> CCTGGATCTGCTGG      |
| JABp123 | chpT_D47A_1          | GGTCTTCCAGCAG <u>AG</u> CCAGCCCCGAGACG      |
| JABp124 | chpT_D47A_2          | CGTCTCGGGCCTGG <u>CT</u> CTGCTGGAAGACC      |
| JABp125 | chpT_L48M_1          | GGGGTCTTCCAGC <u>AT</u> ATCCAGGCCCGAGAC     |
| JABp126 | chpT_L48M_2          | GTCTCGGGCCTGGAT <u>AT</u> GCTGGAAGACCC      |
| JABp127 | chpT_D60A_1          | GATCAGGTTTCATGGC <u>G</u> CGTCGCGCATGTCCTG  |
| JABp128 | chpT_D60A_2          | CAGGACATGCGCGAC <u>G</u> CCGCCATGAACCTGATC  |
| JABp129 | chpT_N63R_1          | CGAGGAGGCGATCAG <u>AC</u> GATGGCGTCGTCG     |
| JABp130 | chpT_N63R_2          | GCGACGACGCCATG <u>CG</u> TCTGATCGCCTCCTCG   |
| JABp131 | chpT_L64D_1          | GGCCGAGGAGGCGAT <u>AT</u> CGTTCATGGCGTCGTCG |

| Primer  | Description         | Primer Sequence (5'–3')                                                       |
|---------|---------------------|-------------------------------------------------------------------------------|
| JABp132 | chpT_L64D_2         | CGACGACGCCATGAACGATATCGCCTCCTCGGCC                                            |
| JABp142 | revamp_pSUMOcpdR_1  | CCACCaaTCTGTTCTCTGTGAGCCTC                                                    |
| JABp143 | revamp_pSUMOcpdR_2  | tctaaActctctCgagAAGCTTGCGGCC                                                  |
| JABp144 | LIC-Loll_ctrA_f     | agattggtggcCGCGTACTGTTGATCGAGGATGAC                                           |
| JABp145 | LIC-Loll_ctrA_r     | gaggagagttagacTCAGGCGGCGTTAACCTGCTC                                           |
| JWKP406 | Gibson_500bp-chpT_1 | AAGCTTCTCTGCAGGATATCTGGATCAGGCGCTCGCCGGC<br>GCGAT                             |
| JWKP407 | Gibson_500bp-chpT_2 | GTAAATTGTCACAAGGCGGCGAACTCTGCCGTGATTT                                         |
| JWKP408 | Gibson_pBXMCS-4_1   | CAGAGTTCGCCGCCTTGTGACAATTTACCGAACAATC                                         |
| JWKP409 | Gibson_pBXMCS-4_2   | CGGAGATTGTTAAAGATTGCGTATAATATTTGCCCATGGA<br>C                                 |
| JWKP410 | Gibson_500bp-chpT_3 | GGGCAAATATTATACGCAATCTTTAACAATCTCCGCGCC                                       |
| JWKP411 | Gibson_500bp-chpT_4 | GTCACGGCCGAAGCTAGCGAATTCGTGCGGGCGCGGCC<br>AGGGCC                              |
| JWKP412 | chpT_seq_1          | ACCTGATCGAGAGCCGGC                                                            |
| JWKP413 | chpT_seq_2          | ATCCCGGTGATCTCGG                                                              |
| WSCp29  | FLAG-cckA_1         | gaataaCataTggactataagGacGaCGacGacaaGTcaGG-<br>CggcGgCGgCtcaCGCGGCTCAGCGCTTTCC |
| WSCp30  | FLAG-cckA_2         | ACCGTCGACTGCAGAGcTCCTACGCCGCCTGCAGCTGCTG<br>CTTG-ACGC                         |

## REFERENCES

- Abel, S., Chien, P., Wassmann, P., Schirmer, T., Kaefer, V., Laub, M.T., Baker, T.A., and Jenal, U. (2011). Regulatory cohesion of cell cycle and cell differentiation through interlinked phosphorylation and second messenger networks. *Mol. Cell* 43, 550-560.
- Bell, C.H., Porter, S.L., Strawson, A., Stuart, D.I., and Armitage, J.P. (2010). Using structural information to change the phosphotransfer specificity of a two-component chemotaxis signalling complex. *PLoS Biol.* 8, e1000306.
- Biondi, E.G., Reisinger, S.J., Skerker, J.M., Arif, M., Perchuk, B.S., Ryan, K.R., and Laub, M.T. (2006). Regulation of the bacterial cell cycle by an integrated genetic circuit. *Nature* 444, 899-904.
- Brilli, M., Fondi, M., Fani, R., Mengoni, A., Ferri, L., Bazzicalupo, M., and Biondi, E.G. (2010). The diversity and evolution of cell cycle regulation in alpha-proteobacteria: a comparative genomic analysis. *BMC Syst. Biol.* 4, 52.
- Buckler, D.R., Zhou, Y., and Stock, A.M. (2002). Evidence of intradomain and interdomain flexibility in an OmpR/PhoB homolog from *Thermotoga maritima*. *Structure* 10, 153-164.
- Capra, E.J., Perchuk, B.S., Ashenberg, O., Seid, C.A., Snow, H.R., Skerker, J.M., and Laub, M.T. (2012a). Spatial tethering of kinases to their substrates relaxes evolutionary constraints on specificity. *Mol. Microbiol.* 86, 1393-1403.
- Capra, E.J., Perchuk, B.S., Skerker, J.M., and Laub, M.T. (2012b). Adaptive mutations that prevent crosstalk enable the expansion of paralogous signaling protein families. *Cell* 150, 222-232.

- Casino, P., Rubio, V., and Marina, A. (2009). Structural insight into partner specificity and phosphoryl transfer in two-component signal transduction. *Cell* 139, 325-336.
- Chen, V.B., Arendall, W.B., 3rd, Headd, J.J., Keedy, D.A., Immormino, R.M., Kapral, G.J., Murray, L.W., Richardson, J.S., and Richardson, D.C. (2010). MolProbity: all-atom structure validation for macromolecular crystallography. *Acta Crystallogr. D Biol. Crystallogr.* 66, 12-21.
- Chien, P., Perchuk, B.S., Laub, M.T., Sauer, R.T., and Baker, T.A. (2007). Direct and adaptor-mediated substrate recognition by an essential AAA+ protease. *Proc. Natl. Acad. Sci. U.S.A.* 104, 6590-6595.
- Christen, B., Abeliuk, E., Collier, J.M., Kalogeraki, V.S., Passarelli, B., Collier, J.A., Fero, M.J., McAdams, H.H., and Shapiro, L. (2011). The essential genome of a bacterium. *Mol. Syst. Biol.* 7, 528.
- Crooks, G.E., Hon, G., Chandonia, J.M., and Brenner, S.E. (2004). WebLogo: a sequence logo generator. *Genome Res.* 14, 1188-1190.
- Das, R., and Baker, D. (2008). Macromolecular modeling with Rosetta. *Annu. Rev. Biochem.* 77, 363-382.
- Gibson, D.G., Young, L., Chuang, R.Y., Venter, J.C., Hutchison, C.A., 3rd, and Smith, H.O. (2009). Enzymatic assembly of DNA molecules up to several hundred kilobases. *Nat. Methods.* 6, 343-345.
- Hillson, N.J., Rosengarten, R.D., and Keasling, J.D. (2012). j5 DNA assembly design automation software. *ACS Synth. Biol.* 1, 14-21.
- Ke, S.H., and Madison, E.L. (1997). Rapid and efficient site-directed mutagenesis by single-tube 'megaprimer' PCR method. *Nucleic Acids Res.* 25, 3371-3372.
- Kelly, S.M., Jess, T.J., and Price, N.C. (2005). How to study proteins by circular dichroism. *Biochim. Biophys. Acta* 1751, 119-139.
- Marks, M.E., Castro-Rojas, C.M., Teiling, C., Du, L., Kapatral, V., Walunas, T.L., and Crosson, S. (2010). The genetic basis of laboratory adaptation in *Caulobacter crescentus*. *J. Bacteriol.* 192, 3678-3688.
- Nierman, W.C., Feldblyum, T.V., Laub, M.T., Paulsen, I.T., Nelson, K.E., Eisen, J.A., Heidelberg, J.F., Alley, M.R., Ohta, N., Maddock, J.R., *et al.* (2001). Complete genome sequence of *Caulobacter crescentus*. *Proc. Natl. Acad. Sci. U.S.A.* 98, 4136-4141.
- Schneider, C.A., Rasband, W.S., and Eliceiri, K.W. (2012). NIH Image to ImageJ: 25 years of image analysis. *Nat. Methods.* 9, 671-675.
- Schneider, T.D., and Stephens, R.M. (1990). Sequence logos: a new way to display consensus sequences. *Nucleic Acids Res.* 18, 6097-6100.
- Skerker, J.M., Perchuk, B.S., Siryaporn, A., Lubin, E.A., Ashenberg, O., Goulian, M., and Laub, M.T. (2008). Rewiring the specificity of two-component signal transduction systems. *Cell* 133, 1043-1054.
- Skerker, J.M., Prasol, M.S., Perchuk, B.S., Biondi, E.G., and Laub, M.T. (2005). Two-component signal transduction pathways regulating growth and cell cycle progression in a bacterium: a system-level analysis. *PLoS Biol.* 3, e334.
- Thanbichler, M., Iniesta, A.A., and Shapiro, L. (2007). A comprehensive set of plasmids for vanillate- and xylose-inducible gene expression in *Caulobacter crescentus*. *Nucleic Acids Res.* 35, e137.



Thanbichler, M., and Shapiro, L. (2006). MipZ, a spatial regulator coordinating chromosome segregation with cell division in *Caulobacter*. *Cell* 126, 147-162.

Vriend, G. (1990). WHAT IF: a molecular modeling and drug design program. *J. Mol. Graph.* 8, 52-56, 29.

Wang, K.H., Sauer, R.T., and Baker, T.A. (2007). ClpS modulates but is not essential for bacterial N-end rule degradation. *Genes Dev.* 21, 403-408.

Weeks, S.D., Drinker, M., and Loll, P.J. (2007). Ligation independent cloning vectors for expression of SUMO fusions. *Protein Expr. Purif.* 53, 40-50.

Zhang, Y. (2008). I-TASSER server for protein 3D structure prediction. *BMC Bioinformatics* 9, 40.
